# Supplementary material for: Carborane bridged ferrocenyl conjugated molecules: synthesis, structure, electrochemistry and photophysical properties
Source: Royal Society of Chemistry journal article supplement (doi:10.1039/d0nj00826e), 2020-01-01
Supplement: d0nj00826e1.pdf [file d0nj00826e1.pdf]

## **Carborane Bridged Ferrocenyl Conjugated Molecules: Synthesis, Structure, Electrochemistry and Photophysics Properties**

Jian-Feng Yan, Gai-Ge Zhu, Ye Yuan, Cai-Xia Lin, Shu-Ping Huang\* and Yao-Feng  
Yuan\*

Key Laboratory of Molecule Synthesis and Function Discovery (Fujian Province  
University), Department of Chemistry, Fuzhou University, Fuzhou 350108, People's  
Republic of China.

Corresponding to e-mail: huangshp@gmail.com, yaofeng\_yuan@fzu.edu.cn.

### **Table of Contents**

|                                         |                                                                                                                                               |
|-----------------------------------------|-----------------------------------------------------------------------------------------------------------------------------------------------|
| Figure S1, S4, S7, S11, S15, S19 -----  | <sup>1</sup> H NMR spectrum of compound <b>3, 7, 8, 9, 10</b> and <b>11</b>                                                                   |
| Figure S2, S5, S8, S12, S16, S20 -----  | <sup>13</sup> C NMR spectrum of compound <b>3, 7, 8, 9, 10</b> and <b>11</b>                                                                  |
| Figure S9, S13, S17, S21 -----          | <sup>11</sup> B NMR spectrum of compound <b>8, 9, 10</b> and <b>11</b>                                                                        |
| Figure S3, S6, S10, S14, S18, S22 ----- | HRMS spectrum of compound <b>3, 7, 8, 9, 10</b> and <b>11</b>                                                                                 |
| Figure S23-S26 -----                    | Frontier molecular orbital distributions related to electron transitions in the absorption spectra for compound <b>8, 9, 10</b> and <b>11</b> |
| Table S27-S30 -----                     | Cartesian coordinates and energies for optimized structures of compound <b>8, 9, 10</b> and <b>11</b>                                         |

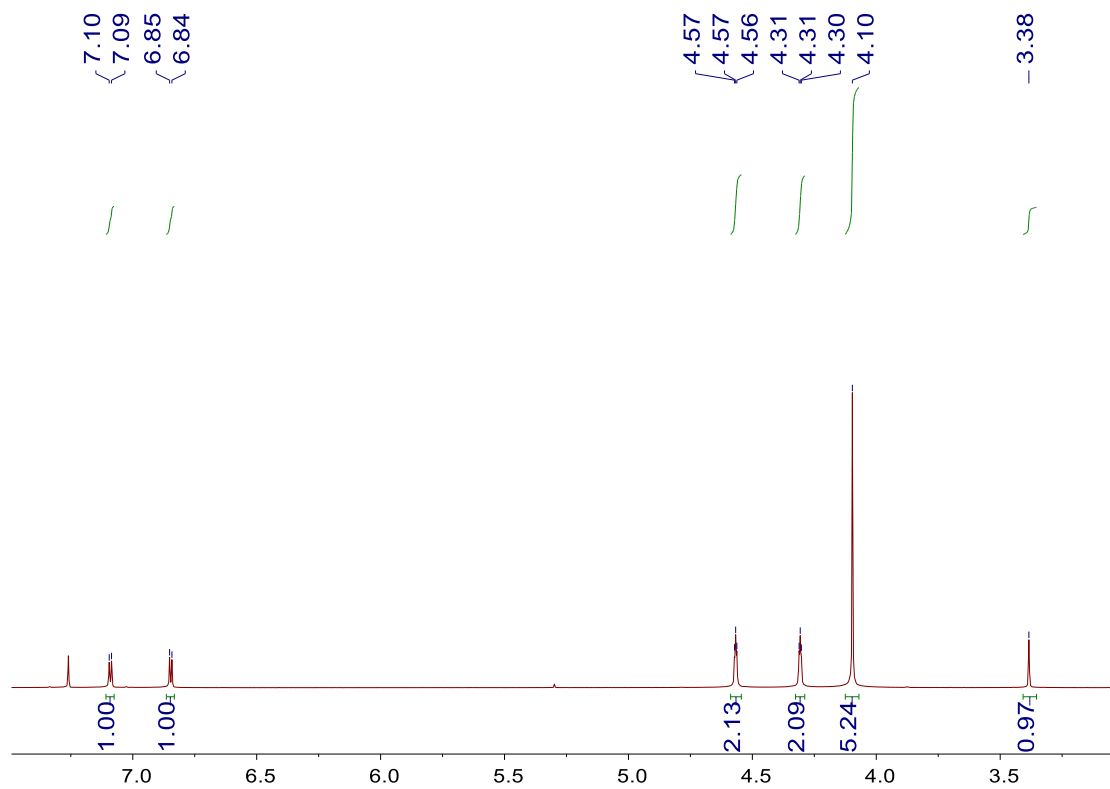

Figure S1.  $^1\text{H}$  NMR spectrum of **3** ( $\text{CDCl}_3$ )

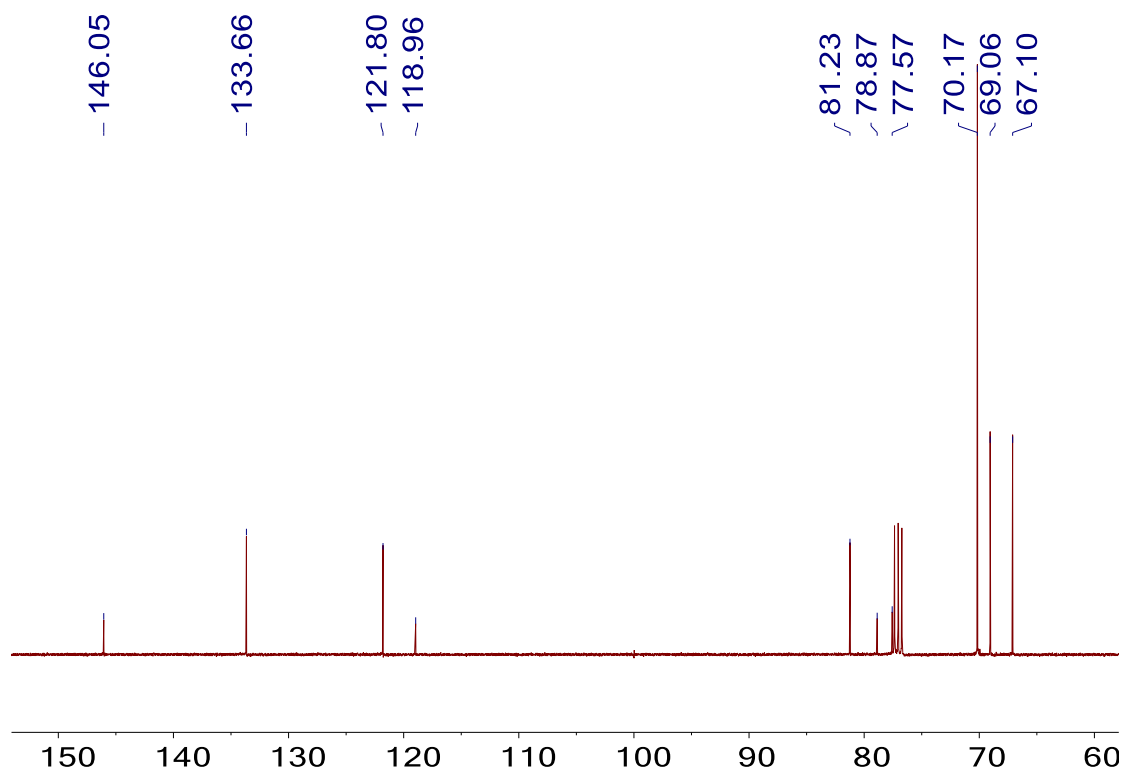

Figure S2.  $^{13}\text{C}$  NMR spectrum of **3** ( $\text{CDCl}_3$ )

2YY-5 #11 RT: 0.10 AV: 1 NL: 9.19E6  
T: FTMS + p ESI Full ms [100.0000-700.0000]

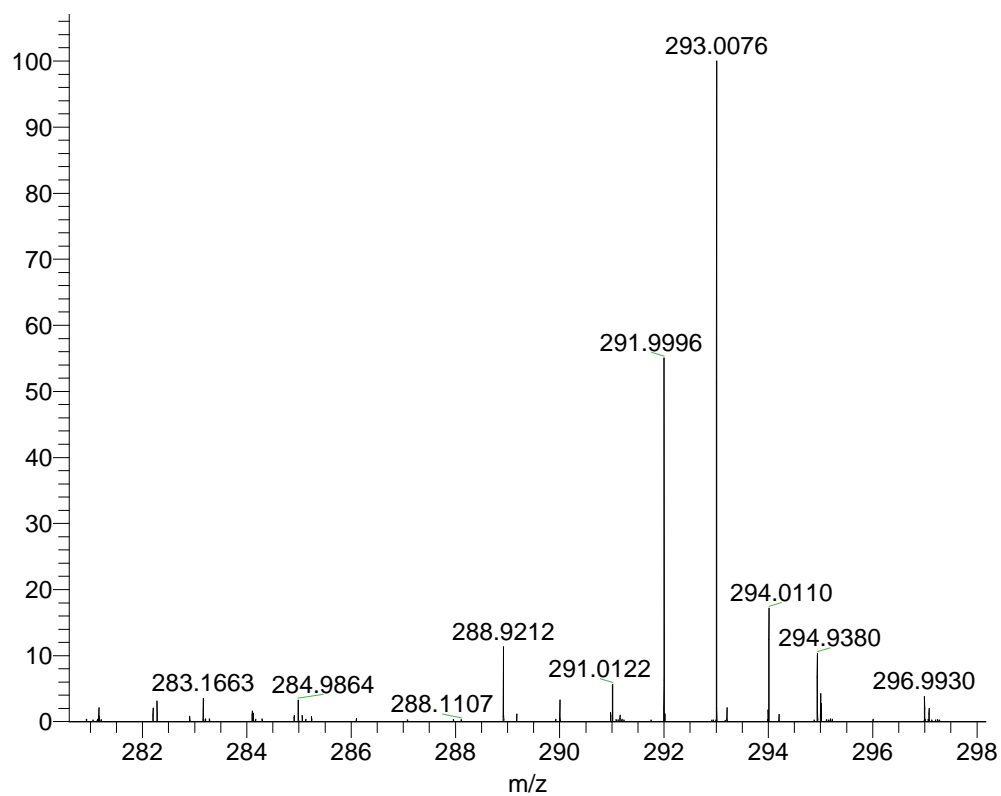

Figure S3. HRMS spectrum of **3**

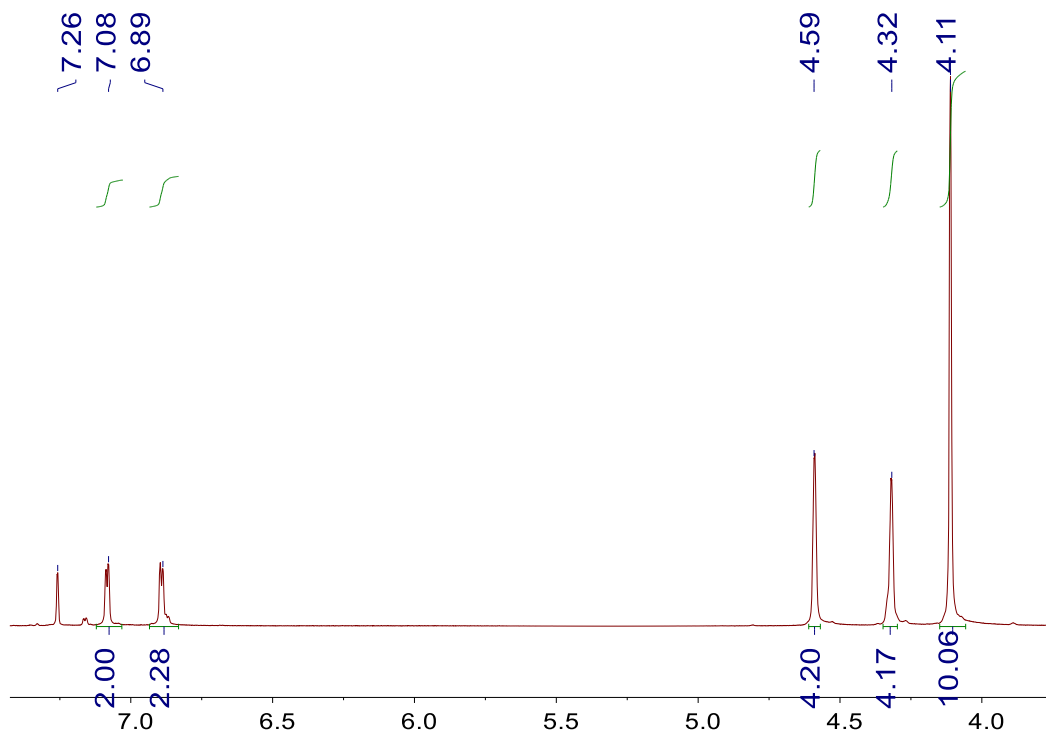

Figure S4. <sup>1</sup>H NMR spectrum of **5** (CDCl<sub>3</sub>)

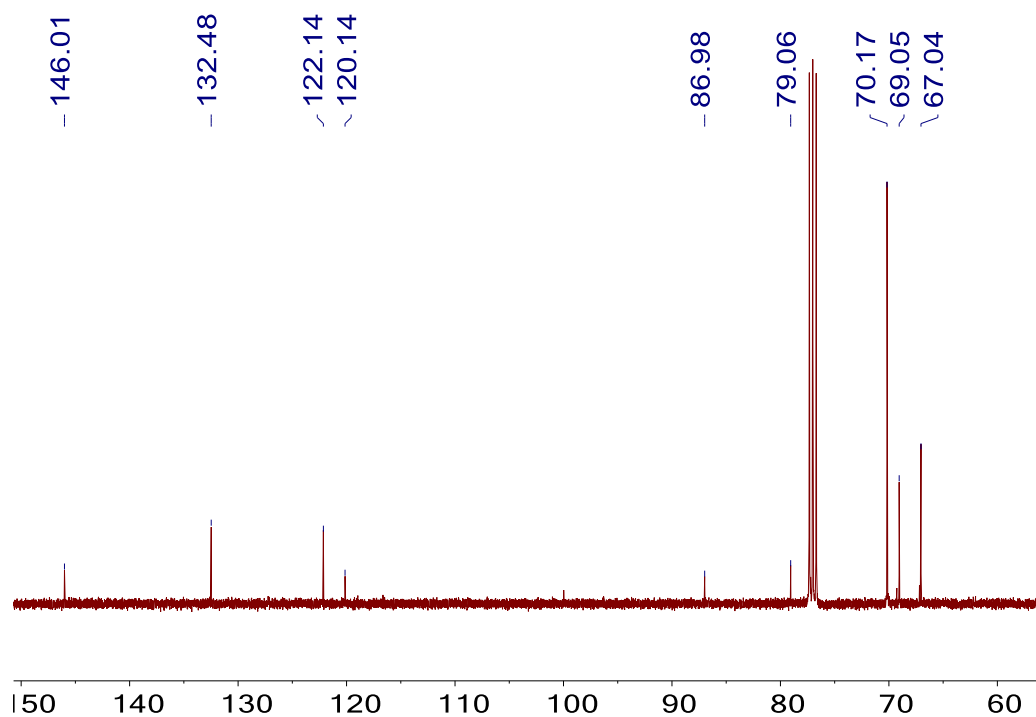

Figure S5.  $^{13}\text{C}$  NMR spectrum of **5** ( $\text{CDCl}_3$ )

2YY-6 #15 RT: 0.15 AV: 1 NL: 3.23E6  
 T: FTMS + p ESI Full ms [200.0000-1000.0000]

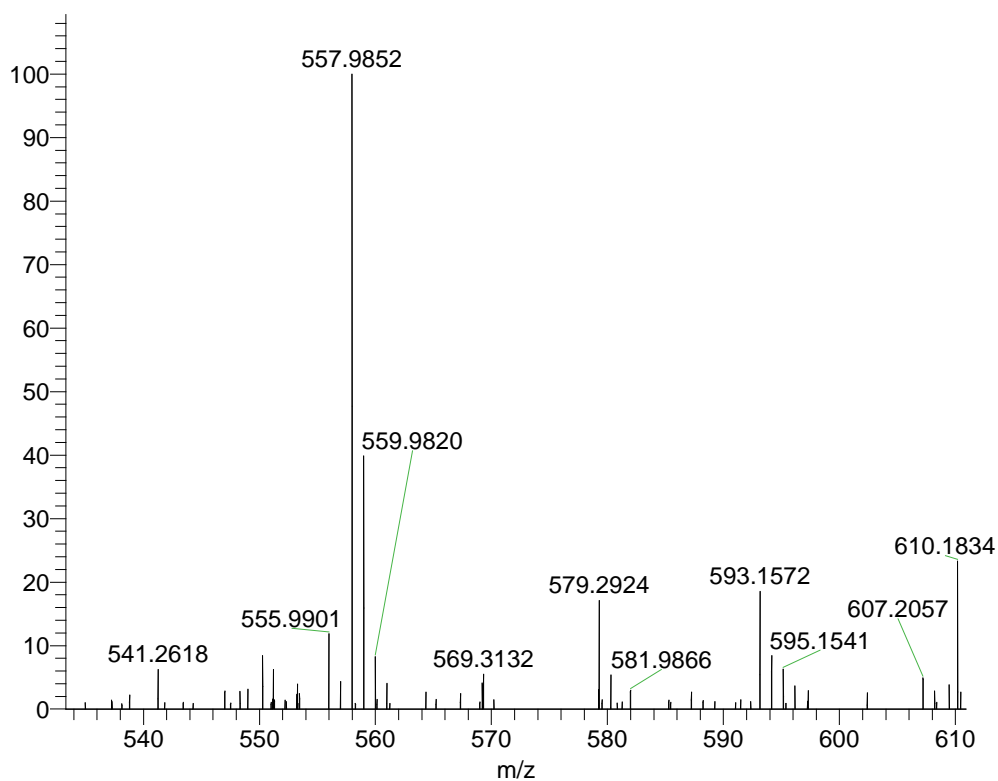

Figure S6. HRMS spectrum of **5**

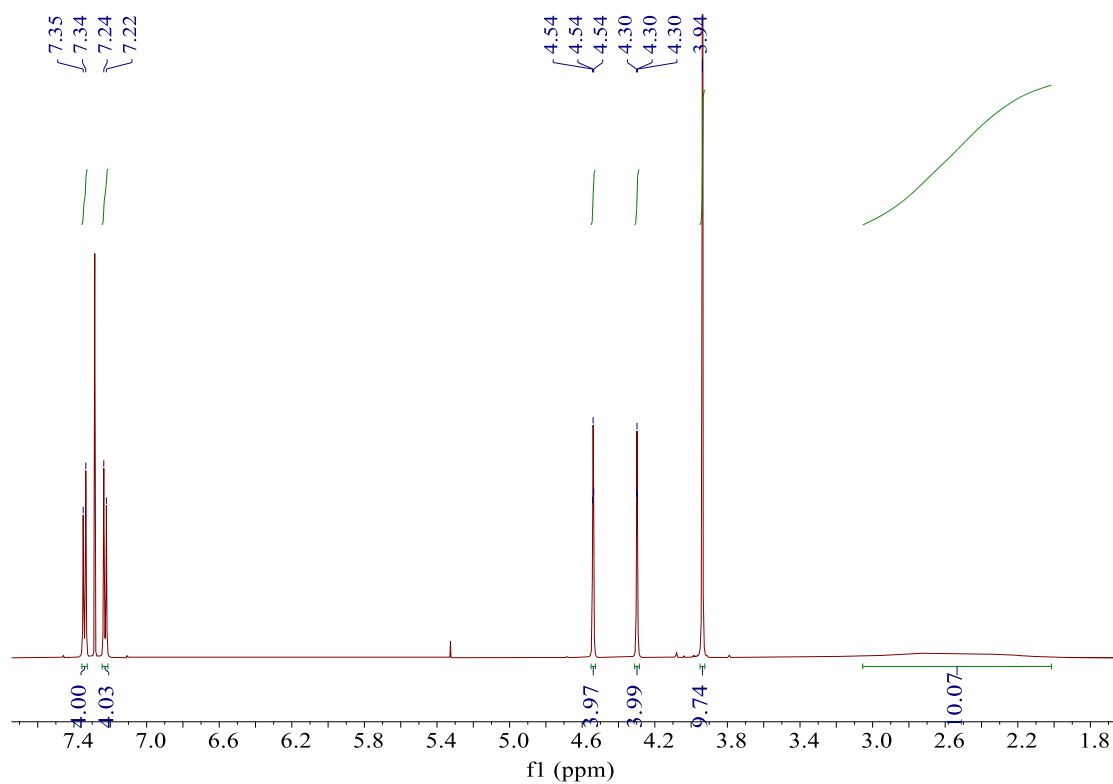

Figure S7.  $^1\text{H}$  NMR spectrum of **8** ( $\text{CDCl}_3$ )

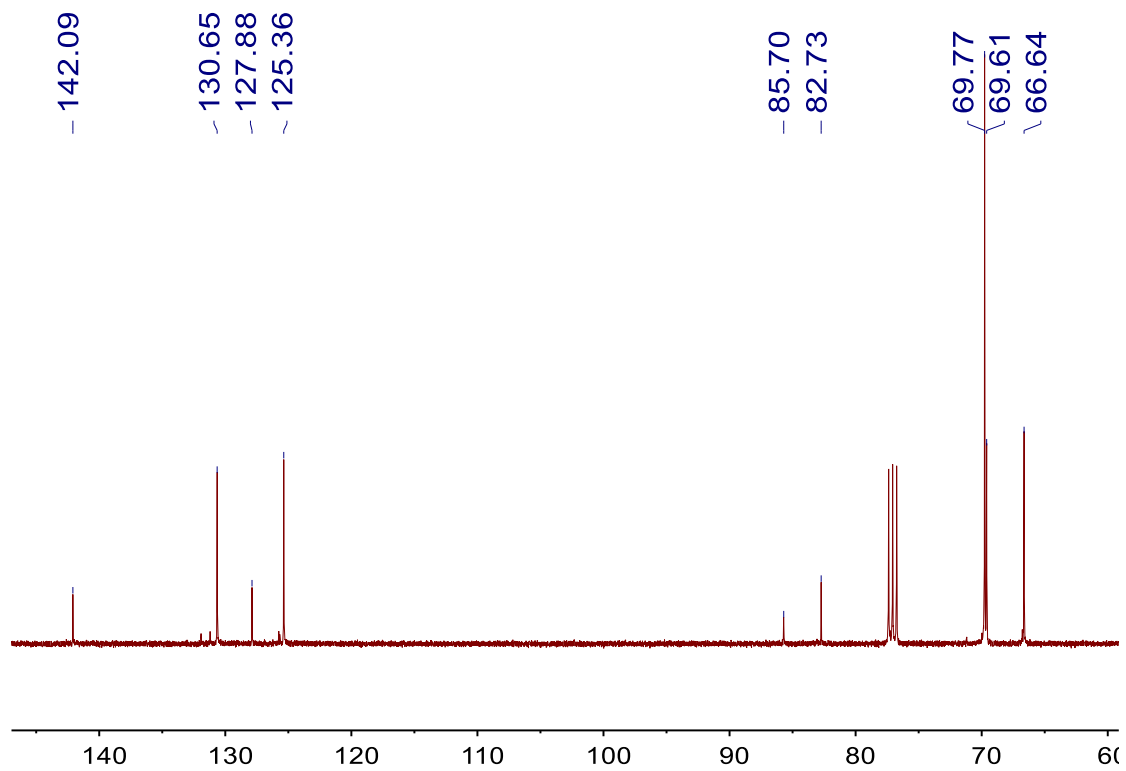

Figure S8.  $^{13}\text{C}$  NMR spectrum of **8** ( $\text{CDCl}_3$ )

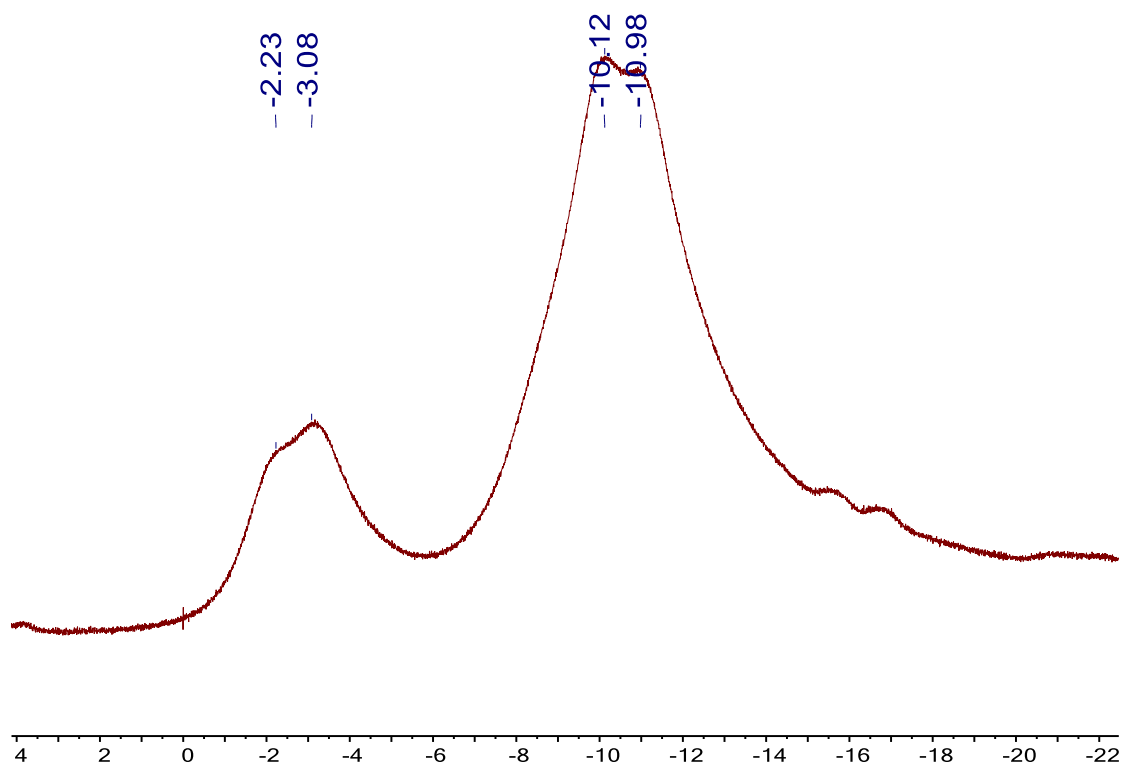

Figure S9.  $^{11}\text{B}$  NMR spectrum of **8** ( $\text{CDCl}_3$ )

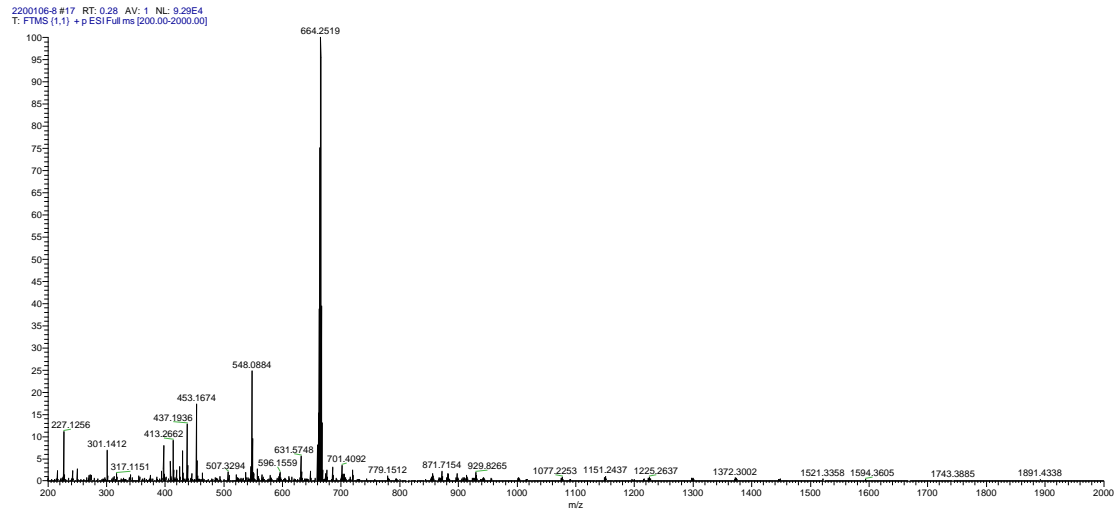

Figure S10. HRMS spectrum of **8**

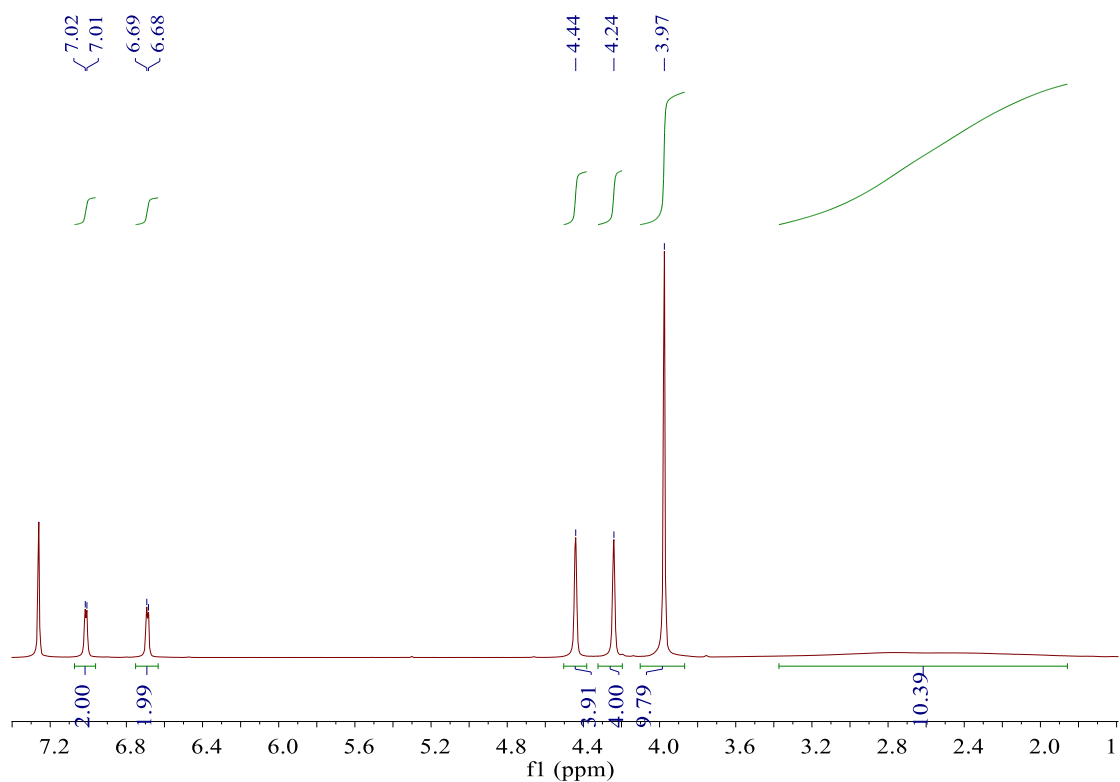

Figure S11.  $^1\text{H}$  NMR spectrum of **9** ( $\text{CDCl}_3$ )

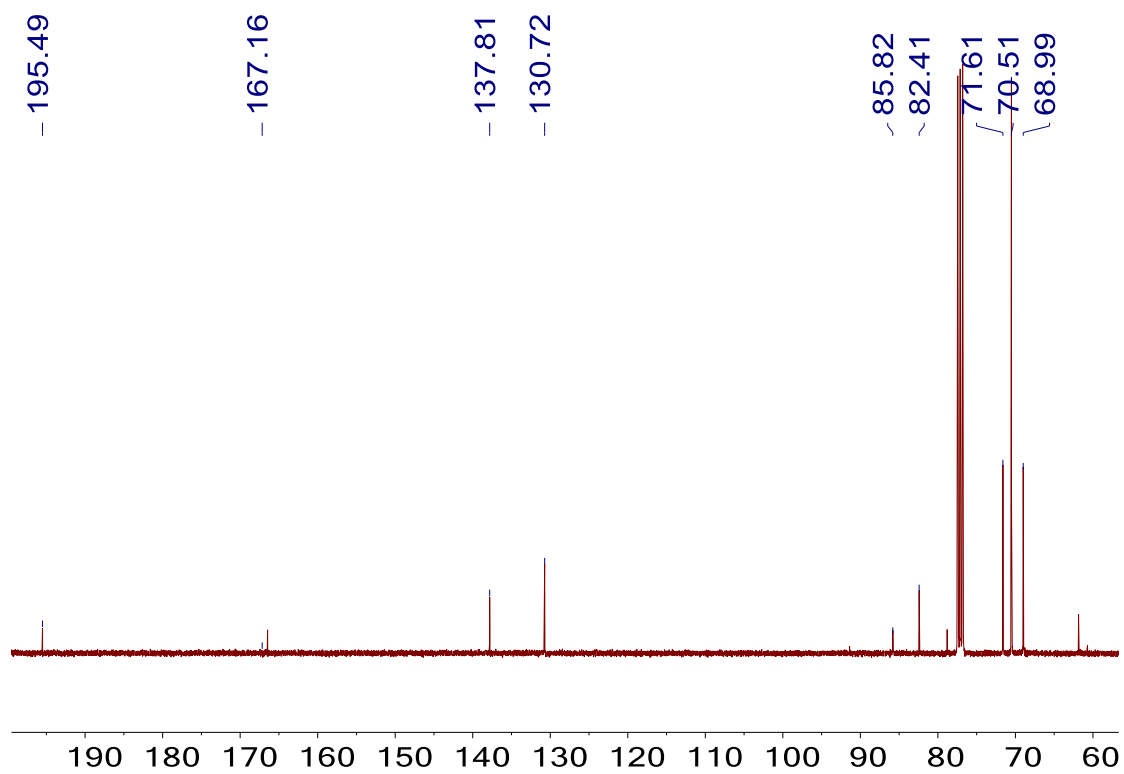

Figure S12.  $^{13}\text{C}$  NMR spectrum of **9** ( $\text{CDCl}_3$ )

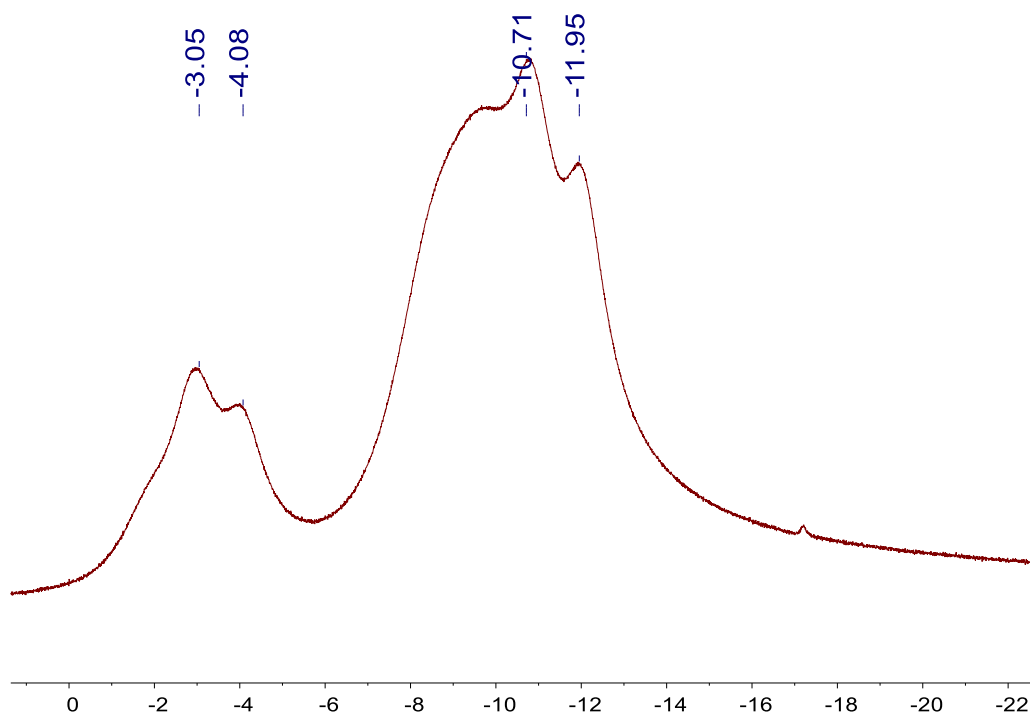

Figure S13.  $^{11}\text{B}$  NMR spectrum of **9** ( $\text{CDCl}_3$ )

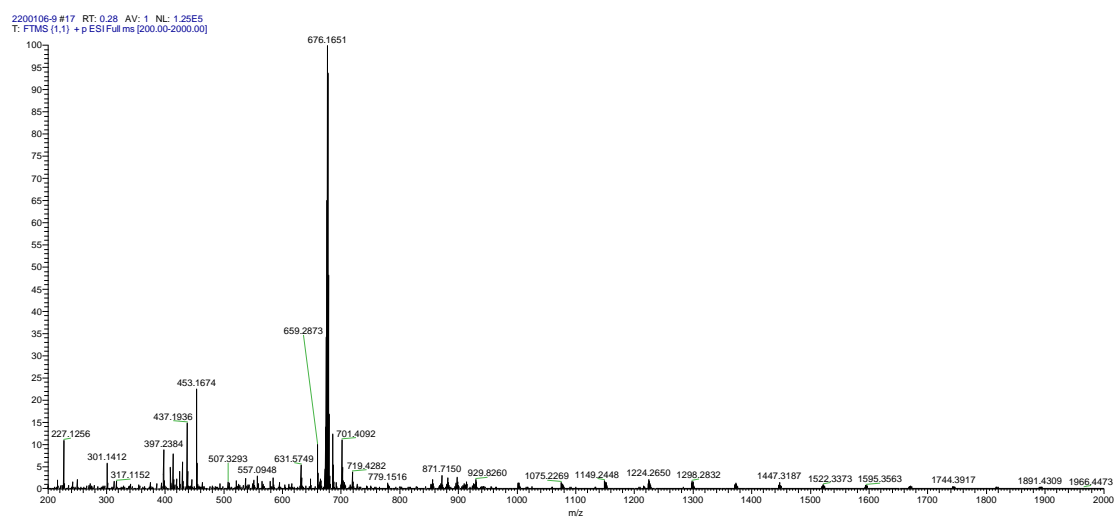

Figure S14. HRMS spectrum of **9**



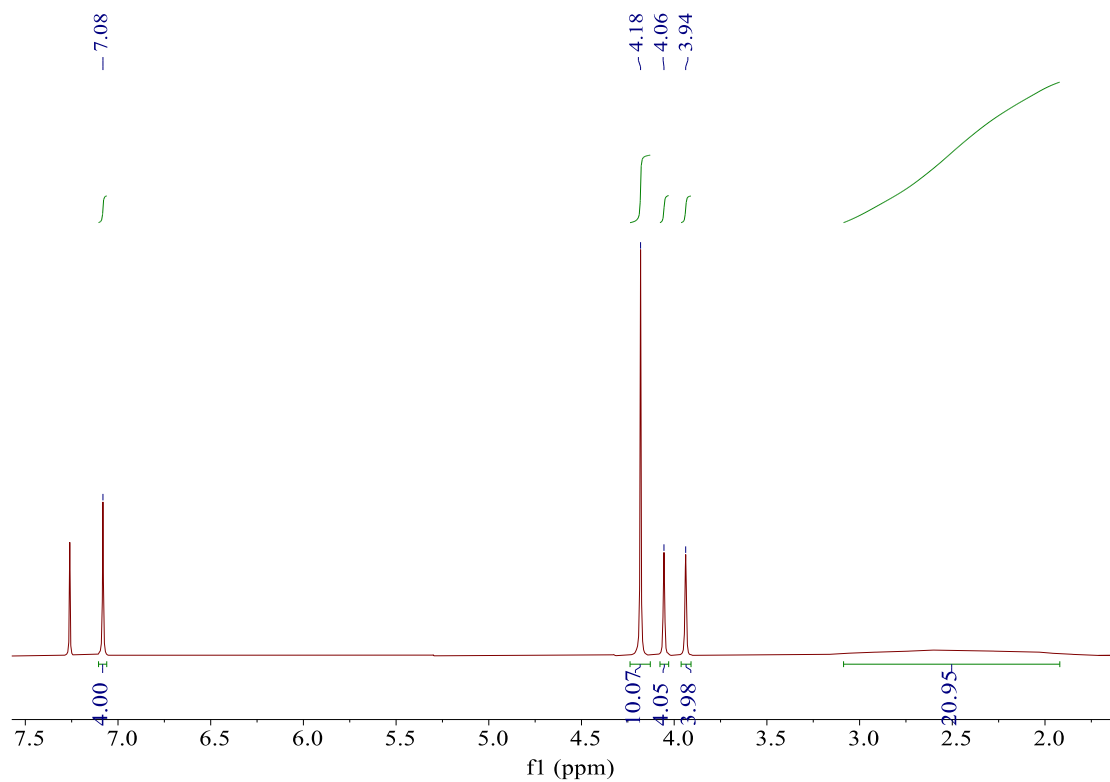

Figure S15.  $^1\text{H}$  NMR spectrum of **10** ( $\text{CDCl}_3$ )

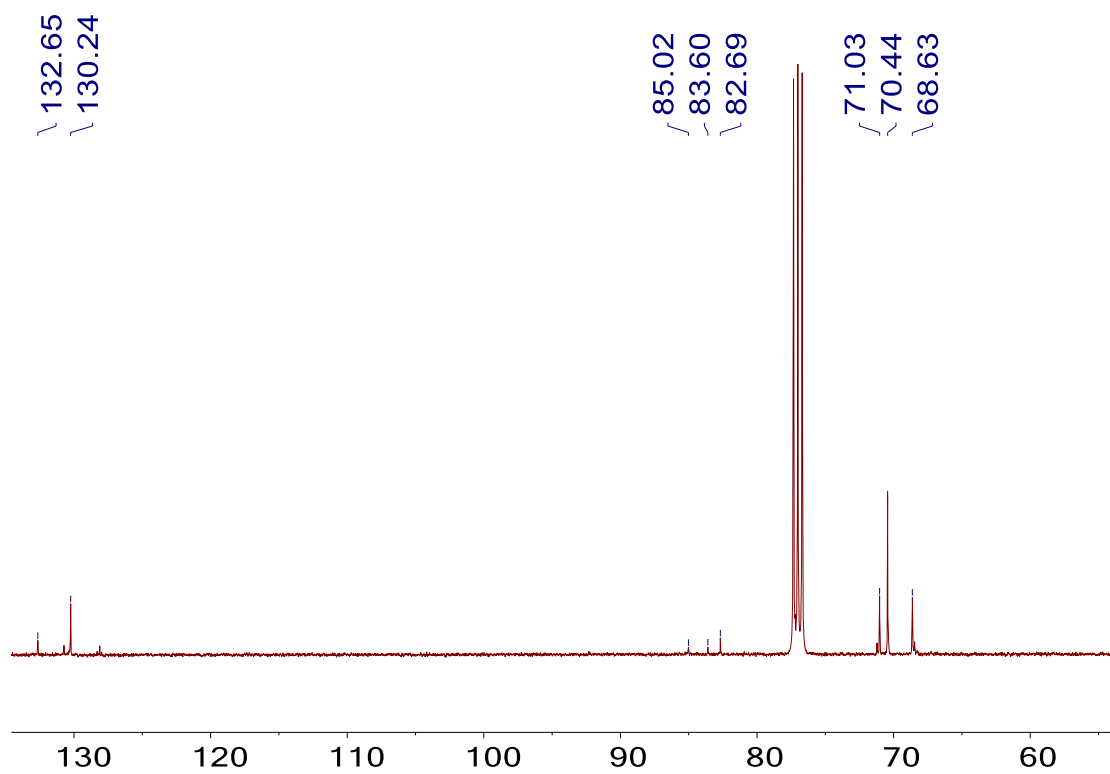

Figure S16.  $^{13}\text{C}$  NMR spectrum of **10** ( $\text{CDCl}_3$ )

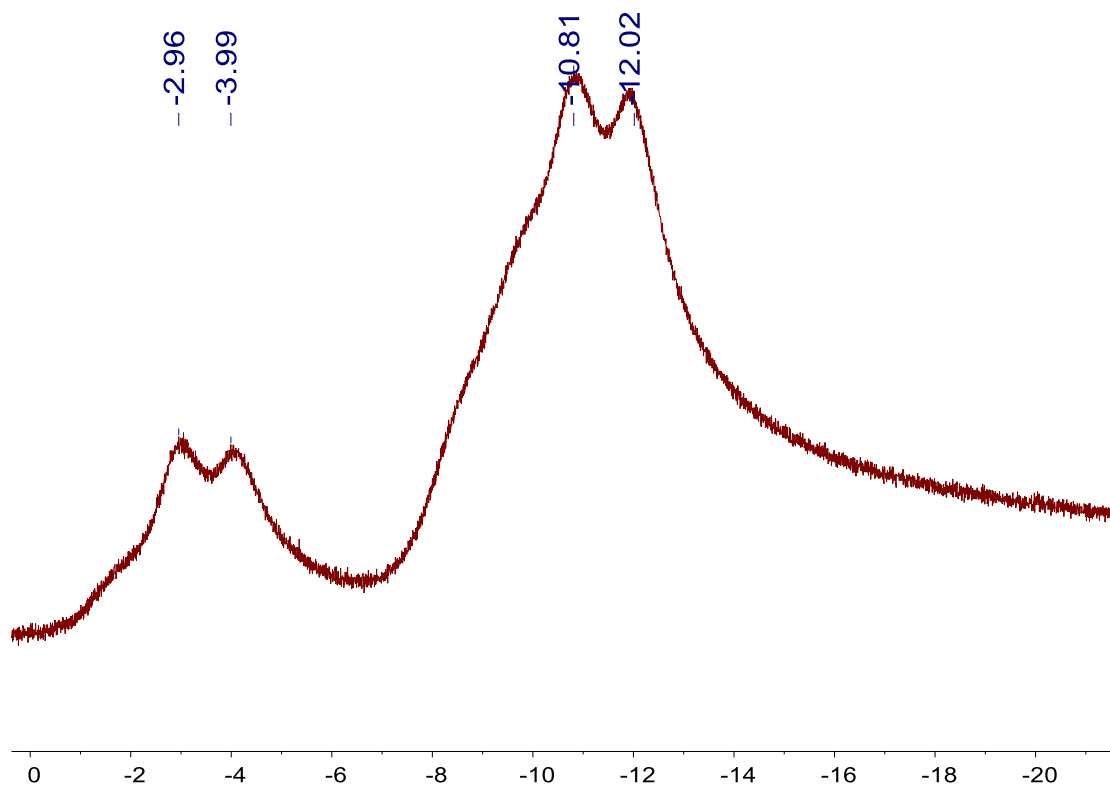

Figure S17.  $^{11}\text{B}$  NMR spectrum of **10** ( $\text{CDCl}_3$ )

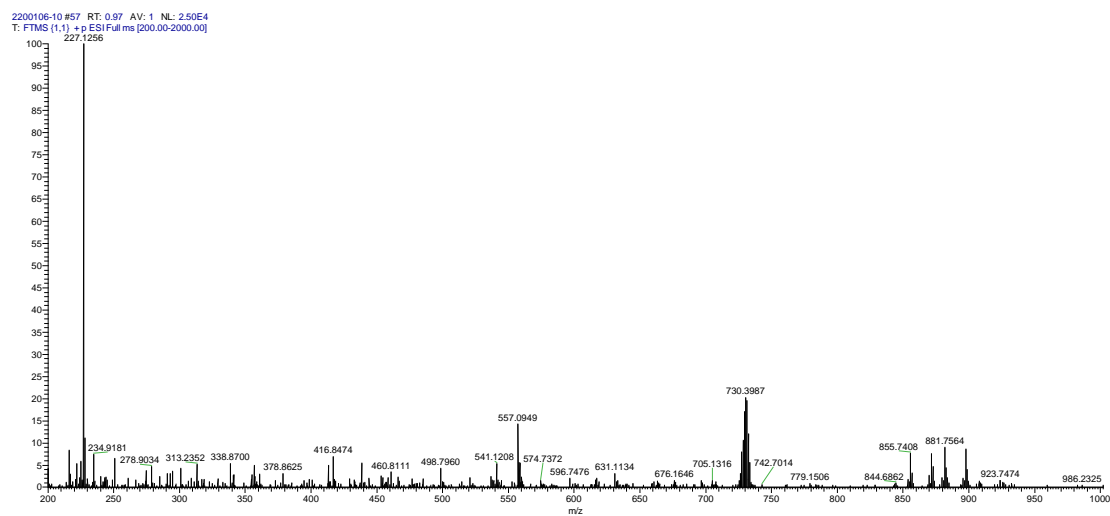

Figure S18. HRMS spectrum of **10**

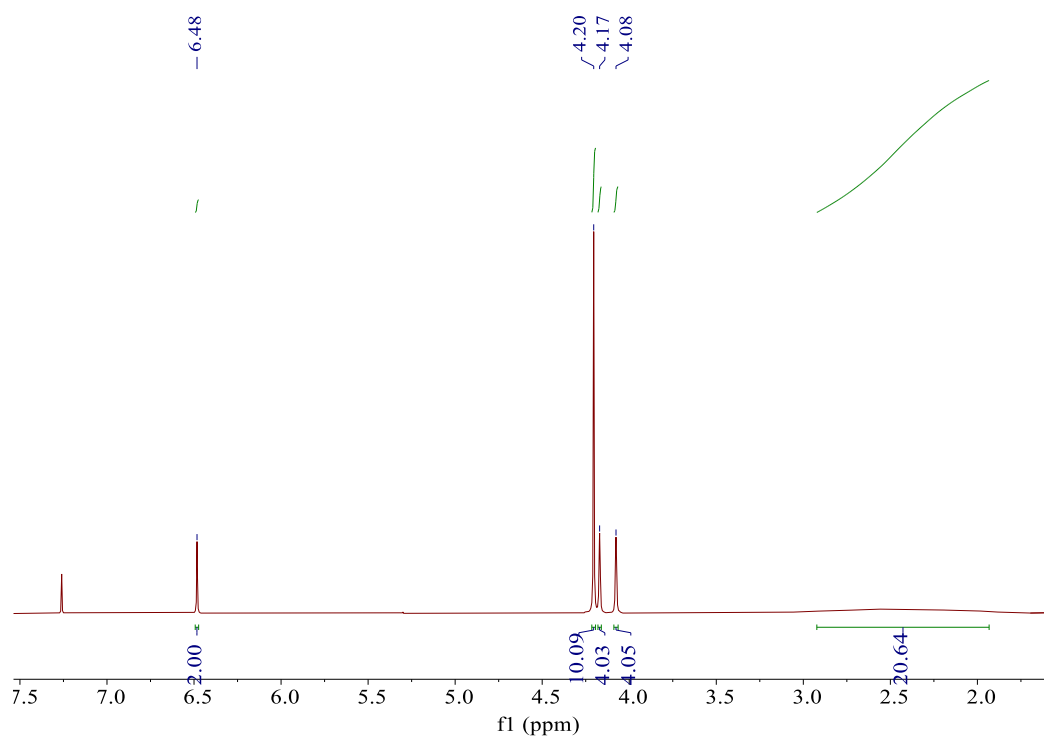

Figure S19.  $^1\text{H}$  NMR spectrum of **11** ( $\text{CDCl}_3$ )

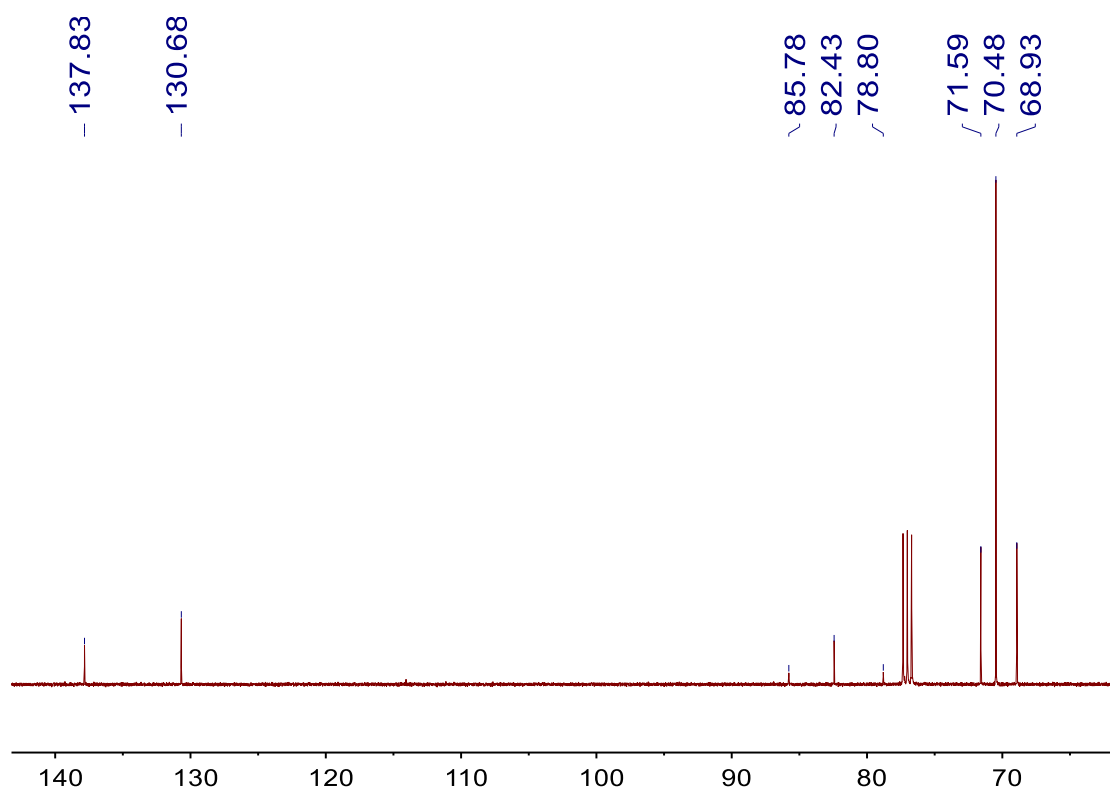

Figure S20.  $^{13}\text{C}$  NMR spectrum of **11** ( $\text{CDCl}_3$ )

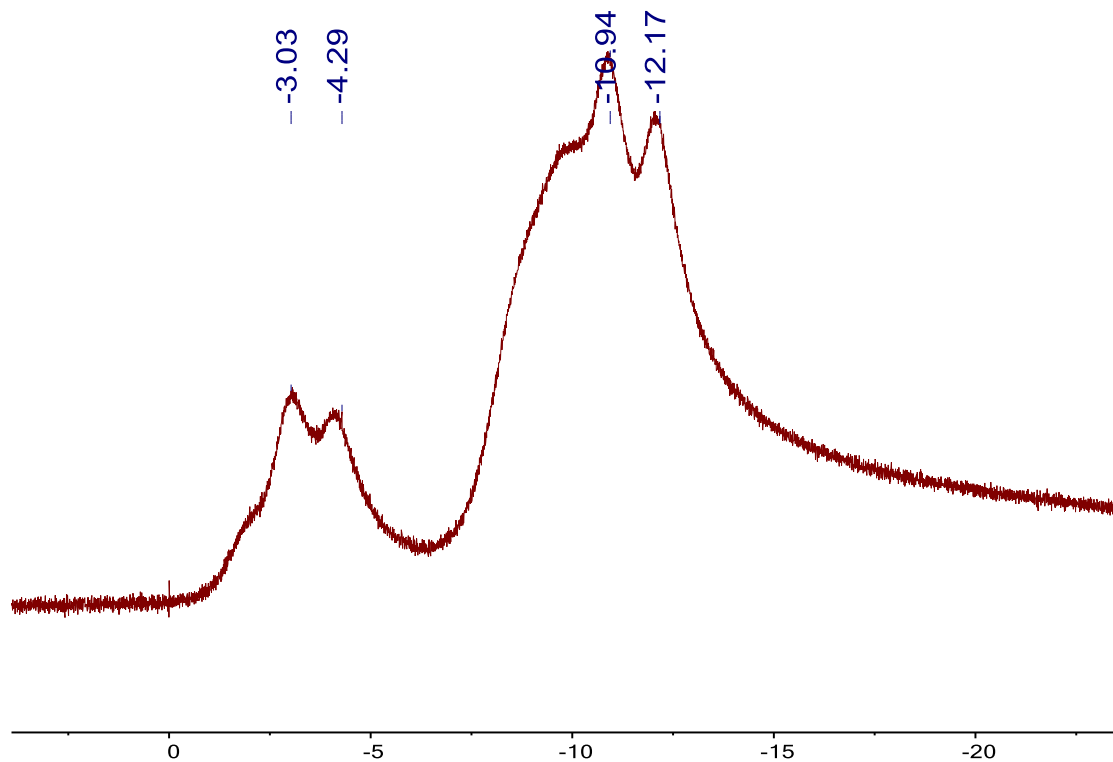

Figure S21.  $^{11}\text{B}$  NMR spectrum of **11** ( $\text{CDCl}_3$ )

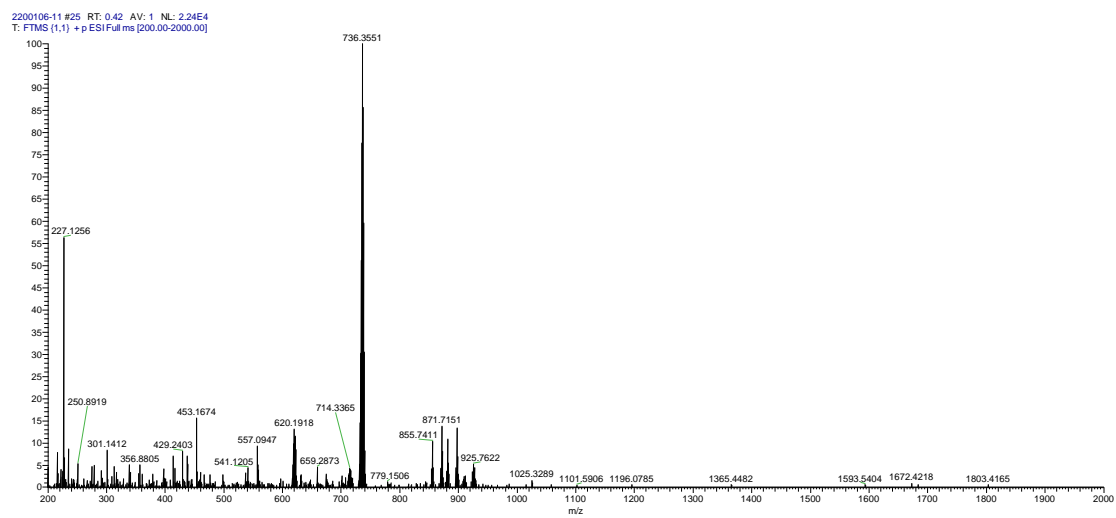

Figure S22. HRMS spectrum of **11**

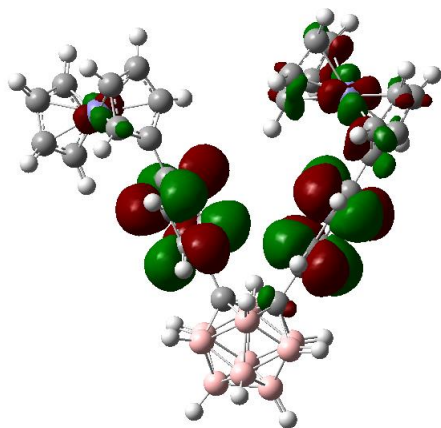

LUMO+4

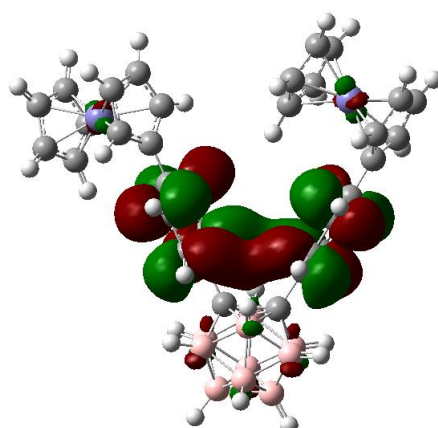

LUMO+2

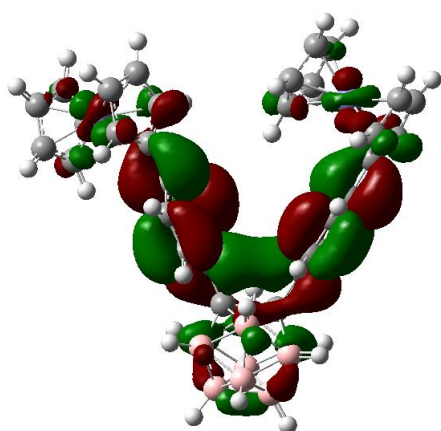

LUMO+1

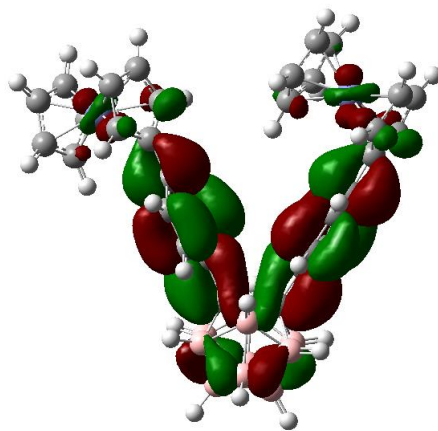

LUMO

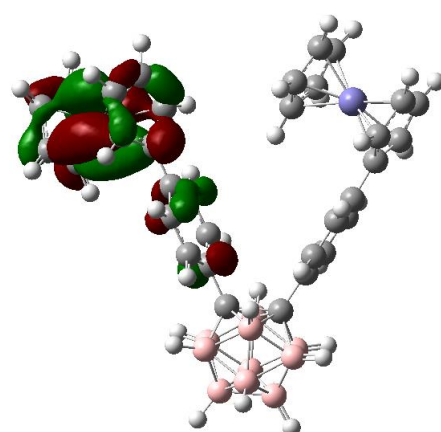

HOMO

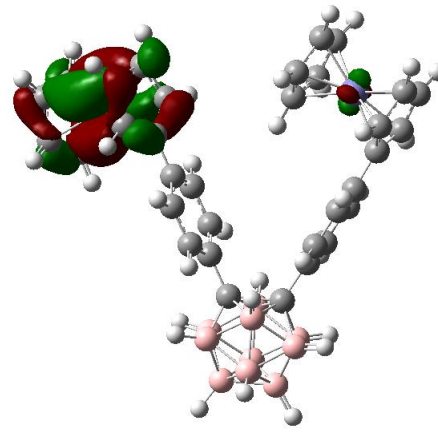

HOMO-2

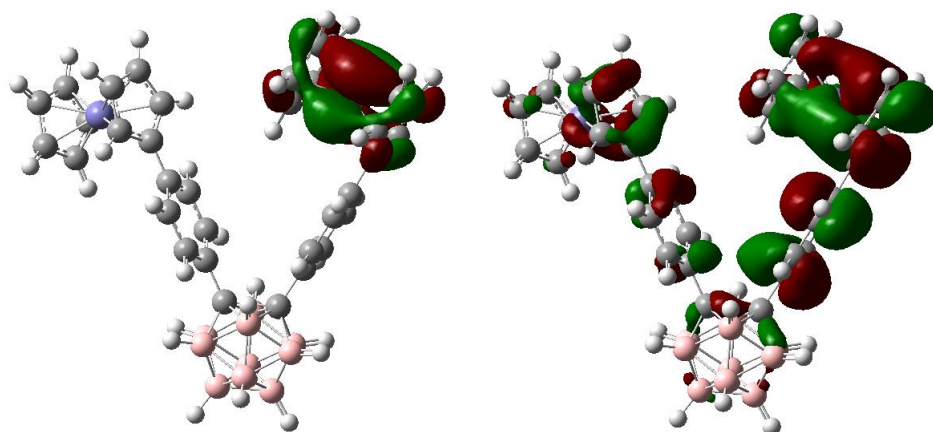

HOMO-3

HOMO-4

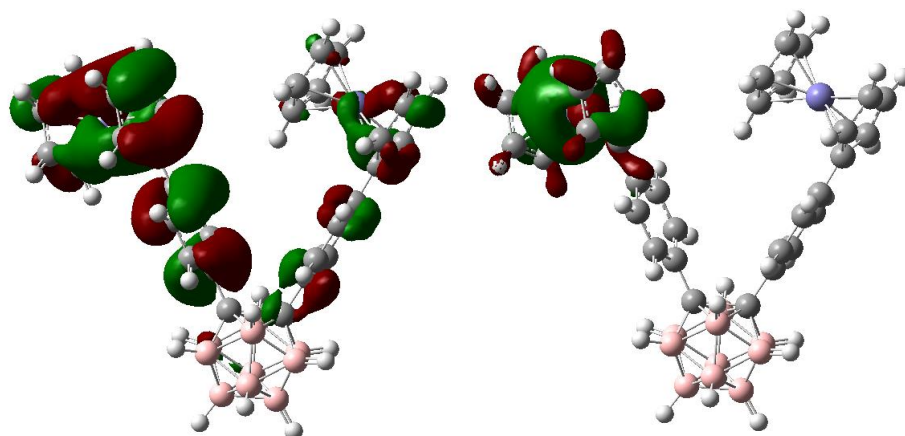

HOMO-5

HOMO-6

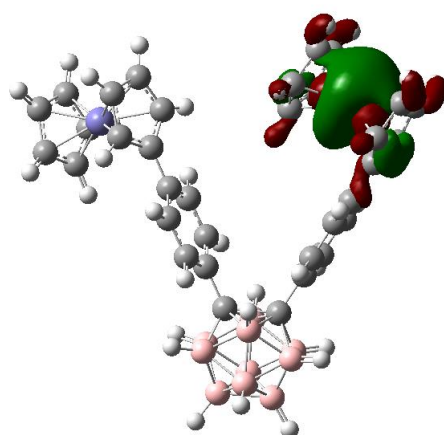

HOMO-7

**Figure S23.** Frontier molecular orbital distributions related to electron transitions in the absorption spectra for **8**.

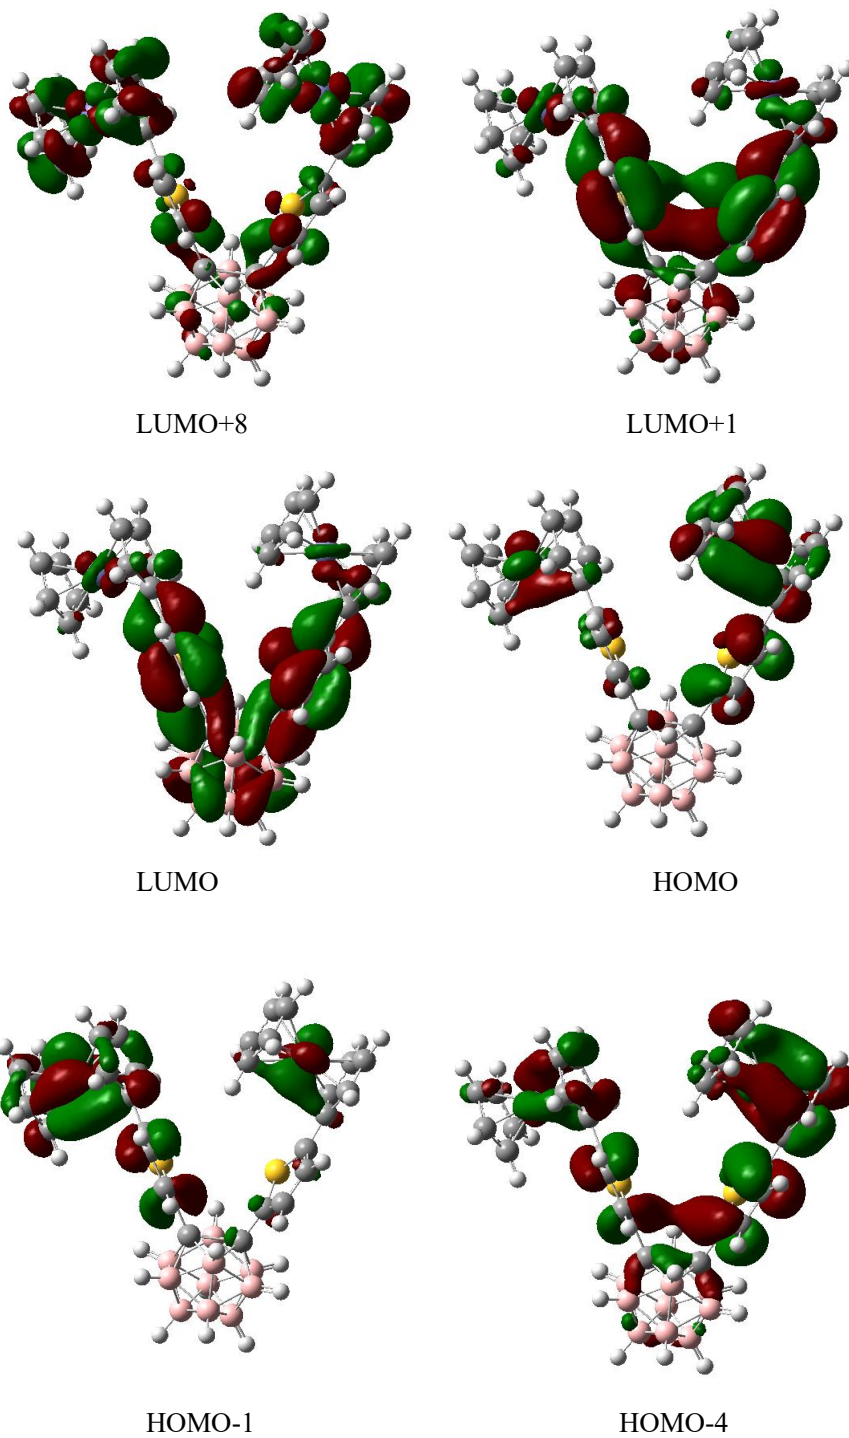

**Figure S24.** Frontier molecular orbital distributions related to electron transitions in the absorption spectra for **9**

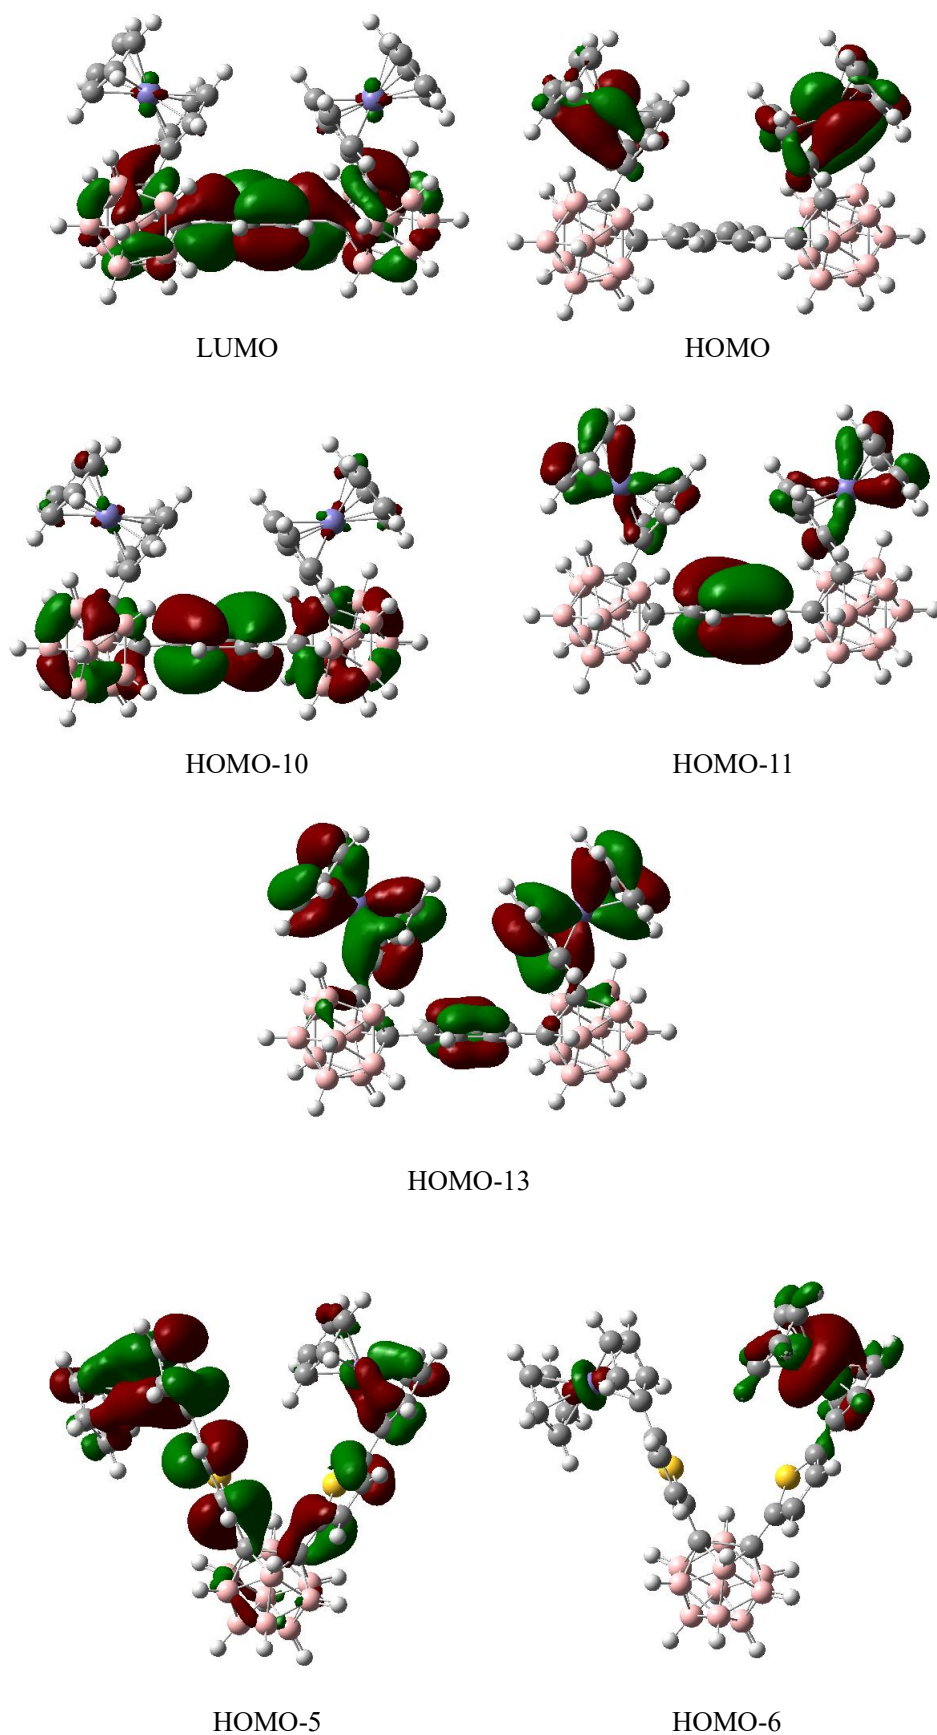

**Figure S25.** Frontier molecular orbital distributions related to electron transitions in the absorption spectra for **10**.



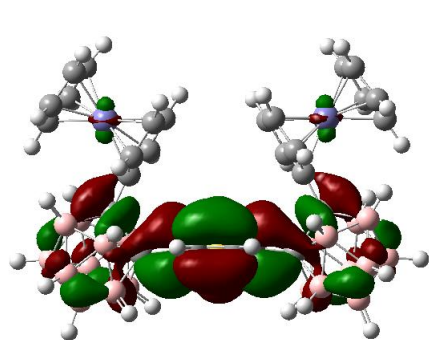

LUMO

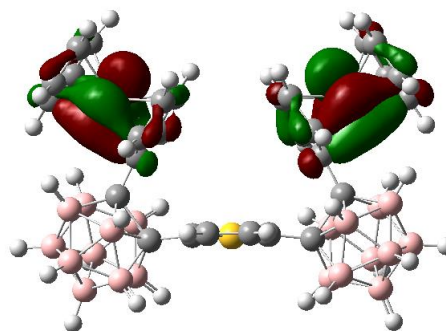

HOMO

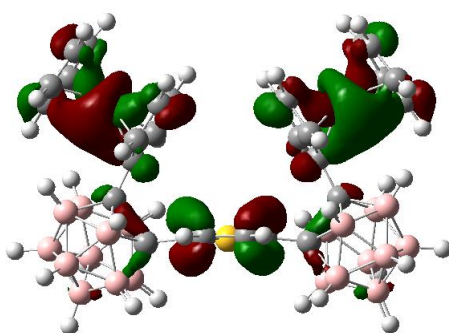

HOMO-4

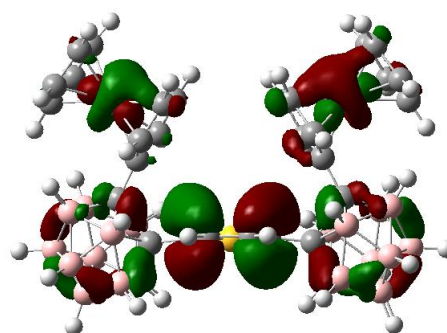

HOMO-6

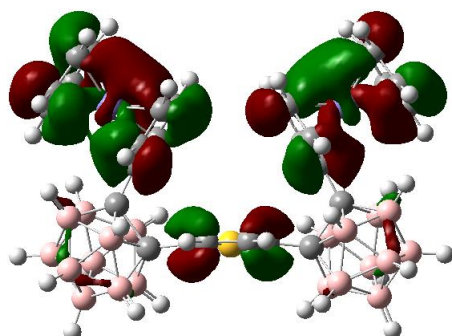

HOMO-7

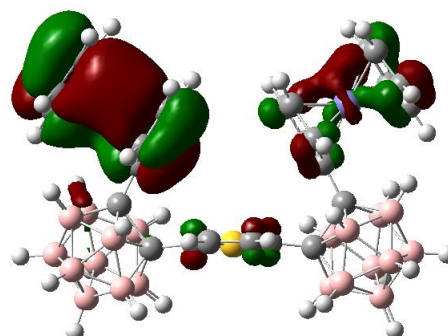

HOMO-8

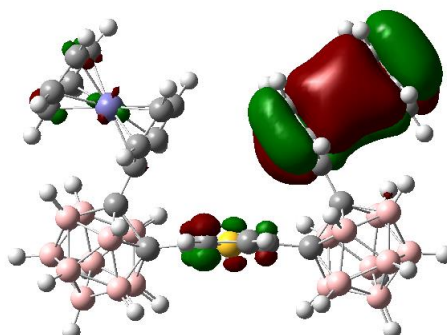

HOMO-9

**Figure S26.** Frontier molecular orbital distributions related to electron transitions in the absorption spectra for **11**

**Table S1.** Cartesian coordinates and energies for optimized structures of **8**

Energy: -1813.86004343 a.u.

|    |          |          |          |
|----|----------|----------|----------|
| Fe | 2.08692  | 4.16156  | -0.1181  |
| C  | 3.61205  | 2.77775  | 0.22819  |
| C  | 3.96218  | 3.66408  | -0.84857 |
| C  | 3.62653  | 4.95993  | 1.03025  |
| C  | 3.97697  | 4.99888  | -0.35227 |
| C  | 3.39703  | 3.60066  | 1.38749  |
| C  | 0.14344  | 3.94641  | 0.59063  |
| C  | 0.72116  | 5.31329  | -1.18036 |
| C  | 0.37755  | 5.30114  | 0.20533  |
| C  | 0.34238  | 3.12061  | -0.55691 |
| C  | 0.69935  | 3.96528  | -1.65173 |
| C  | 3.47924  | 1.31215  | 0.15779  |
| H  | 4.18131  | 3.37351  | -1.8664  |
| H  | 3.52012  | 5.81396  | 1.6851   |
| H  | 4.19122  | 5.88717  | -0.93085 |
| H  | 3.08307  | 3.25478  | 2.36225  |
| H  | -0.11473 | 3.6017   | 1.58265  |
| H  | 0.98035  | 6.18691  | -1.7632  |
| H  | 0.3323   | 6.16419  | 0.8558   |
| H  | 0.27473  | 2.04108  | -0.57949 |
| H  | 0.93866  | 3.64015  | -2.65523 |
| C  | 3.46122  | 0.63257  | -1.07298 |
| C  | 3.37617  | 0.53438  | 1.32297  |
| H  | 3.55962  | 1.18897  | -1.99939 |
| C  | 3.29721  | -0.74576 | -1.13551 |
| C  | 3.20718  | -0.84504 | 1.26286  |
| H  | 3.43224  | 1.01125  | 2.2959   |
| C  | 3.14106  | -1.5118  | 0.03106  |
| H  | 3.29043  | -1.23017 | -2.10464 |
| H  | 3.13152  | -1.40368 | 2.1874   |
| C  | 2.93773  | -2.9994  | -0.05133 |
| B  | 2.37787  | -3.84848 | 1.33741  |
| B  | 4.00161  | -4.12184 | 0.67436  |
| B  | 2.16813  | -3.62629 | -1.46785 |
| B  | 3.86823  | -3.9777  | -1.08959 |
| C  | 1.29074  | -3.62962 | 0.0109   |
| B  | 3.00051  | -5.49307 | 1.19213  |
| B  | 1.30787  | -5.15207 | 0.77729  |
| H  | 2.16937  | -3.24994 | 2.3298   |
| C  | -4.48163 | 1.95701  | 0.70945  |
| C  | -5.37033 | -0.40823 | -1.96665 |
| C  | -6.99666 | -0.45813 | -0.32697 |
| H  | -2.77369 | 1.66488  | -0.70073 |
| H  | -4.23601 | -0.80197 | 2.59586  |
| H  | -6.86386 | 1.25194  | -1.76904 |
| H  | -5.81553 | 1.36737  | 2.41154  |
| H  | -4.40657 | -2.3331  | -1.34267 |
| H  | -6.31107 | -2.39664 | 0.56651  |
| H  | -4.91775 | 2.8846   | 0.36451  |
| H  | -4.75481 | -0.08383 | -2.79483 |
| H  | -7.82624 | -0.17684 | 0.30759  |

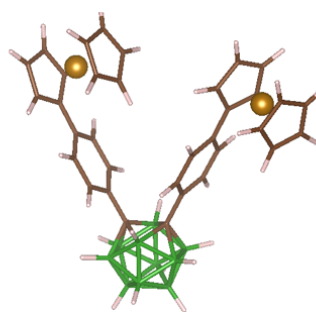

|    |          |          |          |
|----|----------|----------|----------|
| B  | 3.92457  | -5.58508 | -0.33359 |
| H  | 4.92762  | -3.67306 | 1.25805  |
| B  | 2.79191  | -5.2634  | -1.67739 |
| B  | 1.17645  | -5.01551 | -0.98481 |
| H  | 1.85728  | -2.88022 | -2.32339 |
| H  | 4.7059   | -3.43556 | -1.72522 |
| C  | 0.15479  | -2.66303 | 0.2115   |
| B  | 2.26766  | -6.22113 | -0.26539 |
| H  | 3.27328  | -6.11259 | 2.16552  |
| H  | 0.36942  | -5.43235 | 1.44016  |
| H  | 4.87915  | -6.27686 | -0.46148 |
| H  | 2.92378  | -5.71239 | -2.76676 |
| H  | 0.14537  | -5.18377 | -1.53992 |
| C  | -0.48427 | -2.57643 | 1.45781  |
| C  | -0.3177  | -1.84161 | -0.82414 |
| H  | 2.01452  | -7.37742 | -0.33669 |
| H  | -0.15259 | -3.20071 | 2.27904  |
| C  | -1.54204 | -1.69665 | 1.66414  |
| C  | -1.37394 | -0.96141 | -0.6151  |
| H  | 0.13443  | -1.89174 | -1.80642 |
| C  | -2.0112  | -0.86508 | 0.63437  |
| H  | -1.99697 | -1.64119 | 2.64804  |
| H  | -1.7244  | -0.35268 | -1.44271 |
| C  | -3.10792 | 0.09027  | 0.86951  |
| Fe | -5.01765 | 0.06866  | 0.02483  |
| C  | -3.35521 | 1.30138  | 0.13517  |
| C  | -4.11303 | 0.0107   | 1.89294  |
| C  | -6.4875  | 0.29788  | -1.42556 |
| C  | -4.95238 | 1.15809  | 1.79438  |
| C  | -5.18984 | -1.60032 | -1.20198 |
| C  | -6.19475 | -1.63143 | -0.18906 |

**Table S2.** Cartesian coordinates and energies for optimized structures of **9**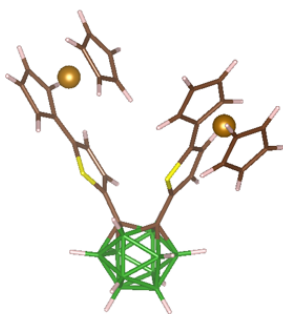

Energy: -2455.36440695 a.u.

|    |          |          |          |    |          |          |          |
|----|----------|----------|----------|----|----------|----------|----------|
| Fe | 3.09261  | 3.28098  | -0.14052 | B  | 1.24552  | -5.94122 | 0.91232  |
| C  | 4.13686  | 1.47456  | -0.25106 | B  | -0.28225 | -5.04899 | 0.80333  |
| C  | 4.01321  | 2.07236  | -1.55253 | H  | 1.33408  | -3.74928 | 2.41448  |
| C  | 5.15131  | 3.56198  | -0.20685 | B  | 1.92754  | -6.06897 | -0.73696 |
| C  | 4.64302  | 3.34921  | -1.52342 | H  | 3.65846  | -4.86819 | 0.91834  |
| C  | 4.83393  | 2.41846  | 0.58052  | B  | 0.83829  | -5.18217 | -1.84554 |
| C  | 1.90787  | 3.81898  | 1.4799   | B  | -0.53164 | -4.57731 | -0.8924  |
| C  | 1.73349  | 4.78026  | -0.61335 | H  | 0.67529  | -2.52952 | -1.99765 |
| C  | 2.23814  | 4.97437  | 0.70786  | H  | 3.2329   | -4.07395 | -1.96676 |
| C  | 1.19783  | 2.91241  | 0.63677  | C  | -0.61252 | -2.28571 | 0.7039   |
| C  | 1.09131  | 3.50558  | -0.65705 | B  | 0.17422  | -6.16253 | -0.50437 |
| C  | 3.66537  | 0.15772  | 0.16113  | H  | 1.40363  | -6.76682 | 1.74836  |
| H  | 3.52532  | 1.62626  | -2.40883 | H  | -1.18386 | -5.12869 | 1.56464  |
| H  | 5.65949  | 4.44986  | 0.14356  | H  | 2.58032  | -6.99465 | -1.08749 |
| H  | 4.70079  | 4.04514  | -2.3491  | H  | 0.69784  | -5.46286 | -2.98861 |
| H  | 5.06763  | 2.28602  | 1.6277   | H  | -1.6066  | -4.33121 | -1.31987 |
| H  | 2.17226  | 3.64947  | 2.51492  | C  | -0.84379 | -1.88815 | 2.00126  |
| H  | 1.84364  | 5.46663  | -1.44215 | S  | -1.36101 | -1.16485 | -0.41826 |
| H  | 2.79916  | 5.83211  | 1.05358  | H  | -0.44727 | -7.15567 | -0.68712 |
| H  | 0.83299  | 1.93385  | 0.91846  | H  | -0.48022 | -2.44118 | 2.85797  |
| H  | 0.62792  | 3.05601  | -1.52458 | C  | -1.59811 | -0.69227 | 2.10283  |
| C  | 3.89084  | -0.49772 | 1.3544   | C  | -1.96236 | -0.16542 | 0.88112  |
| S  | 2.69679  | -0.82935 | -0.90372 | C  | -2.70852 | 1.06072  | 0.62153  |
| C  | 3.28321  | -1.77566 | 1.42035  | Fe | -4.65375 | 1.25043  | -0.11302 |
| C  | 2.59402  | -2.11819 | 0.27865  | C  | -2.7229  | 1.82823  | -0.59395 |
| C  | 1.91392  | -3.39457 | -0.00376 | C  | -3.54375 | 1.75085  | 1.56619  |
| B  | 1.2086   | -4.22233 | 1.34191  | C  | -6.21018 | 1.25917  | -1.48832 |
| B  | 2.58655  | -4.89037 | 0.41907  | C  | -4.04027 | 2.93294  | 0.94581  |
| B  | 0.81872  | -3.48846 | -1.32463 | C  | -5.42719 | -0.64923 | -0.44837 |
| B  | 2.3383   | -4.42682 | -1.27853 | C  | -6.24627 | 0.05615  | 0.4837   |
| C  | 0.09933  | -3.49326 | 0.24484  | C  | -3.53483 | 2.9801   | -0.38803 |
| C  | -5.40449 | 0.09369  | -1.66713 | H  | -4.71253 | 3.64981  | 1.39703  |
| C  | -6.73073 | 1.23578  | -0.1592  | H  | -4.88446 | -1.56447 | -0.2537  |
| H  | -2.19809 | 1.57435  | -1.50514 | H  | -6.44327 | -0.23774 | 1.50579  |
| H  | -3.77037 | 1.41568  | 2.56888  |    |          |          |          |
| H  | -6.37358 | 2.03784  | -2.22108 |    |          |          |          |
| H  | -3.7482  | 3.74345  | -1.12359 |    |          |          |          |
| H  | -4.8513  | -0.1669  | -2.5593  |    |          |          |          |
| H  | -7.35796 | 1.99338  | 0.29096  |    |          |          |          |
| H  | -1.85138 | -0.22102 | 3.04513  |    |          |          |          |
| H  | 4.48442  | -0.07565 | 2.15654  |    |          |          |          |
| H  | 3.36434  | -2.43606 | 2.27497  |    |          |          |          |

**Table S3.** Cartesian coordinates and energies for optimized structures of **10**

Energy: -1813.86004343 a.u.

|    |          |          |          |  |  |  |  |
|----|----------|----------|----------|--|--|--|--|
| Fe | 2.08692  | 4.16156  | -0.1181  |  |  |  |  |
| C  | 3.61205  | 2.77775  | 0.22819  |  |  |  |  |
| C  | 3.96218  | 3.66408  | -0.84857 |  |  |  |  |
| C  | 3.62653  | 4.95993  | 1.03025  |  |  |  |  |
| C  | 3.97697  | 4.99888  | -0.35227 |  |  |  |  |
| C  | 3.39703  | 3.60066  | 1.38749  |  |  |  |  |
| C  | 0.14344  | 3.94641  | 0.59063  |  |  |  |  |
| C  | 0.72116  | 5.31329  | -1.18036 |  |  |  |  |
| C  | 0.37755  | 5.30114  | 0.20533  |  |  |  |  |
| C  | 0.34238  | 3.12061  | -0.55691 |  |  |  |  |
| C  | 0.69935  | 3.96528  | -1.65173 |  |  |  |  |
| C  | 3.47924  | 1.31215  | 0.15779  |  |  |  |  |
| H  | 4.18131  | 3.37351  | -1.8664  |  |  |  |  |
| H  | 3.52012  | 5.81396  | 1.6851   |  |  |  |  |
| H  | 4.19122  | 5.88717  | -0.93085 |  |  |  |  |
| H  | 3.08307  | 3.25478  | 2.36225  |  |  |  |  |
| H  | -0.11473 | 3.6017   | 1.58265  |  |  |  |  |
| H  | 0.98035  | 6.18691  | -1.7632  |  |  |  |  |
| H  | 0.3323   | 6.16419  | 0.8558   |  |  |  |  |
| H  | 0.27473  | 2.04108  | -0.57949 |  |  |  |  |
| H  | 0.93866  | 3.64015  | -2.65523 |  |  |  |  |
| C  | 3.46122  | 0.63257  | -1.07298 |  |  |  |  |
| C  | 3.37617  | 0.53438  | 1.32297  |  |  |  |  |
| H  | 3.55962  | 1.18897  | -1.99939 |  |  |  |  |
| C  | 3.29721  | -0.74576 | -1.13551 |  |  |  |  |
| C  | 3.20718  | -0.84504 | 1.26286  |  |  |  |  |
| H  | 3.43224  | 1.01125  | 2.2959   |  |  |  |  |
| C  | 3.14106  | -1.5118  | 0.03106  |  |  |  |  |
| H  | 3.29043  | -1.23017 | -2.10464 |  |  |  |  |
| H  | 3.13152  | -1.40368 | 2.1874   |  |  |  |  |
| C  | 2.93773  | -2.9994  | -0.05133 |  |  |  |  |
| B  | 2.37787  | -3.84848 | 1.33741  |  |  |  |  |
| B  | 4.00161  | -4.12184 | 0.67436  |  |  |  |  |
| B  | 2.16813  | -3.62629 | -1.46785 |  |  |  |  |
| B  | 3.86823  | -3.9777  | -1.08959 |  |  |  |  |
| C  | 1.29074  | -3.62962 | 0.0109   |  |  |  |  |
| B  | 3.00051  | -5.49307 | 1.19213  |  |  |  |  |
| B  | 1.30787  | -5.15207 | 0.77729  |  |  |  |  |
| H  | 2.16937  | -3.24994 | 2.3298   |  |  |  |  |
| C  | -4.48163 | 1.95701  | 0.70945  |  |  |  |  |
| C  | -5.37033 | -0.40823 | -1.96665 |  |  |  |  |
| C  | -6.99666 | -0.45813 | -0.32697 |  |  |  |  |
| H  | -2.77369 | 1.66488  | -0.70073 |  |  |  |  |
| H  | -4.23601 | -0.80197 | 2.59586  |  |  |  |  |
| H  | -6.86386 | 1.25194  | -1.76904 |  |  |  |  |
| H  | -5.81553 | 1.36737  | 2.41154  |  |  |  |  |
| H  | -4.40657 | -2.3331  | -1.34267 |  |  |  |  |
| H  | -6.31107 | -2.39664 | 0.56651  |  |  |  |  |
| H  | -4.91775 | 2.8846   | 0.36451  |  |  |  |  |
| H  | -4.75481 | -0.08383 | -2.79483 |  |  |  |  |
| H  | -7.82624 | -0.17684 | 0.30759  |  |  |  |  |
| B  | 3.92457  | -5.58508 | -0.33359 |  |  |  |  |
| H  | 4.92762  | -3.67306 | 1.25805  |  |  |  |  |
| B  | 2.79191  | -5.2634  | -1.67739 |  |  |  |  |
| B  | 1.17645  | -5.01551 | -0.98481 |  |  |  |  |
| H  | 1.85728  | -2.88022 | -2.32339 |  |  |  |  |
| H  | 4.7059   | -3.43556 | -1.72522 |  |  |  |  |
| C  | 0.15479  | -2.66303 | 0.2115   |  |  |  |  |
| B  | 2.26766  | -6.22113 | -0.26539 |  |  |  |  |
| H  | 3.27328  | -6.11259 | 2.16552  |  |  |  |  |
| H  | 0.36942  | -5.43235 | 1.44016  |  |  |  |  |
| H  | 4.87915  | -6.27686 | -0.46148 |  |  |  |  |
| H  | 2.92378  | -5.71239 | -2.76676 |  |  |  |  |
| H  | 0.14537  | -5.18377 | -1.53992 |  |  |  |  |
| C  | -0.48427 | -2.57643 | 1.45781  |  |  |  |  |
| C  | -0.3177  | -1.84161 | -0.82414 |  |  |  |  |
| H  | 2.01452  | -7.37742 | -0.33669 |  |  |  |  |
| H  | -0.15259 | -3.20071 | 2.27904  |  |  |  |  |
| C  | -1.54204 | -1.69665 | 1.66414  |  |  |  |  |
| C  | -1.37394 | -0.96141 | -0.6151  |  |  |  |  |
| H  | 0.13443  | -1.89174 | -1.80642 |  |  |  |  |
| C  | -2.0112  | -0.86508 | 0.63437  |  |  |  |  |
| H  | -1.99697 | -1.64119 | 2.64804  |  |  |  |  |
| H  | -1.7244  | -0.35268 | -1.44271 |  |  |  |  |
| C  | -3.10792 | 0.09027  | 0.86951  |  |  |  |  |
| Fe | -5.01765 | 0.06866  | 0.02483  |  |  |  |  |
| C  | -3.35521 | 1.30138  | 0.13517  |  |  |  |  |
| C  | -4.11303 | 0.0107   | 1.89294  |  |  |  |  |
| C  | -6.4875  | 0.29788  | -1.42556 |  |  |  |  |
| C  | -4.95238 | 1.15809  | 1.79438  |  |  |  |  |
| C  | -5.18984 | -1.60032 | -1.20198 |  |  |  |  |
| C  | -6.19475 | -1.63143 | -0.18906 |  |  |  |  |

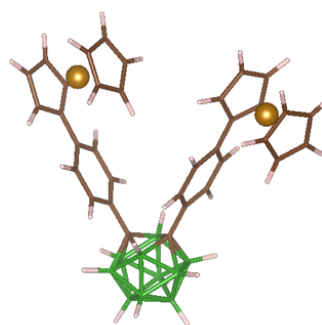

**Table S4.** Cartesian coordinates and energies for optimized structures of **11**

Energy: -2234.44786275 a.u.

|    |          |          |          |
|----|----------|----------|----------|
| Fe | 3.8135   | 2.33612  | -0.14422 |
| C  | 3.02739  | 0.40677  | 0.05877  |
| C  | 2.43737  | 1.08137  | -1.06471 |
| C  | 2.74539  | 1.19493  | 1.22676  |
| C  | 1.78964  | 2.25437  | -0.5876  |
| C  | 1.97865  | 2.32407  | 0.82588  |
| C  | 5.8662   | 2.29485  | -0.51337 |
| C  | 4.76217  | 4.08831  | 0.43053  |
| C  | 4.51008  | 4.10419  | -0.97473 |
| C  | 5.19244  | 2.99375  | -1.5579  |
| C  | 5.5998   | 2.96792  | 0.71611  |
| C  | 3.72054  | -0.91114 | 0.02456  |
| H  | 2.48808  | 0.75475  | -2.09302 |
| H  | 3.07164  | 0.97172  | 2.23179  |
| H  | 1.27823  | 2.98431  | -1.19952 |
| H  | 1.6318   | 3.11393  | 1.4777   |
| H  | 6.44991  | 1.39359  | -0.63004 |
| H  | 4.36112  | 4.78407  | 1.1552   |
| H  | 3.88484  | 4.81395  | -1.49945 |
| H  | 5.1795   | 2.71492  | -2.60276 |
| H  | 5.94845  | 2.66544  | 1.6941   |
| B  | 3.30356  | -1.99088 | -1.26305 |
| B  | 3.83004  | -1.8065  | 1.50034  |
| B  | 5.27112  | -1.19717 | 0.65624  |
| B  | 4.93839  | -1.31046 | -1.08807 |
| C  | 2.71994  | -2.35822 | 0.30923  |
| B  | 3.31771  | -3.65581 | -0.6233  |
| B  | 4.72013  | -3.02263 | -1.50097 |
| H  | 2.52666  | -1.62138 | -2.06967 |
| B  | 3.64878  | -3.54024 | 1.11727  |
| B  | 5.25988  | -2.83611 | 1.33201  |
| H  | 3.40301  | -1.31709 | 2.4836   |
| B  | 5.94699  | -2.53976 | -0.29322 |
| H  | 5.83751  | -0.27294 | 1.1259   |
| H  | 5.2724   | -0.46384 | -1.84199 |
| C  | 1.27138  | -2.21245 | 0.59966  |
| B  | 4.95108  | -3.97916 | -0.00691 |
| H  | 2.51649  | -4.41606 | -1.04418 |
| H  | 4.99118  | -3.42235 | -2.58328 |
| H  | -5.14844 | -5.13781 | -0.87678 |
| Fe | -3.90192 | 2.27179  | 0.1722   |
| C  | -2.95926 | 0.97505  | 1.49259  |
| C  | -2.36832 | 1.20022  | -0.73428 |
| H  | -6.93762 | -2.66365 | -1.16728 |
| C  | -2.19934 | 2.16956  | 1.35453  |
| C  | -1.83669 | 2.30907  | -0.01898 |
| C  | -5.16116 | 3.04507  | -1.29407 |
| C  | -5.90708 | 2.2193   | -0.40203 |
| C  | -4.57875 | 4.10196  | -0.53072 |
| C  | -5.78469 | 2.76026  | 0.91229  |
| C  | -4.9636  | 3.92561  | 0.83266  |
| H  | -3.39643 | 0.60086  | 2.40652  |
| H  | -2.27861 | 1.02396  | -1.7961  |
| H  | -1.97019 | 2.86717  | 2.14833  |
| H  | -1.28552 | 3.13226  | -0.45042 |
| H  | -5.03826 | 2.88353  | -2.35635 |
| H  | -6.44252 | 1.32001  | -0.66951 |
| H  | -3.93311 | 4.88164  | -0.91202 |
| H  | -6.21523 | 2.34423  | 1.81295  |
| H  | -4.65868 | 4.54711  | 1.66379  |

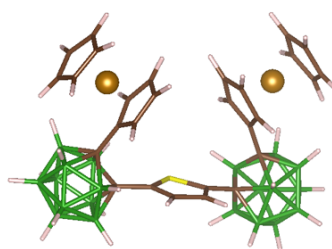

|   |          |          |          |
|---|----------|----------|----------|
| H | 3.07632  | -4.22307 | 1.89431  |
| H | 5.91754  | -3.10058 | 2.28204  |
| H | 7.11128  | -2.59257 | -0.51113 |
| S | 0.07122  | -2.25906 | -0.6647  |
| C | 0.67333  | -2.16799 | 1.83886  |
| H | 5.38722  | -5.08131 | -0.01717 |
| C | -1.23265 | -2.24247 | 0.49466  |
| C | -0.7422  | -2.18623 | 1.77956  |
| H | 1.23387  | -2.15579 | 2.7648   |
| C | -2.64633 | -2.40154 | 0.06942  |
| H | -1.37806 | -2.18769 | 2.65519  |
| B | -3.11318 | -1.83014 | -1.48355 |
| B | -3.8773  | -2.06694 | 1.22052  |
| B | -3.5841  | -3.71899 | 0.6177   |
| B | -3.10307 | -3.57045 | -1.08461 |
| C | -3.68561 | -0.96235 | -0.09903 |
| B | -4.78583 | -1.23886 | -1.36282 |
| B | -4.45422 | -2.86556 | -1.9887  |
| H | -2.28783 | -1.32325 | -2.15613 |
| B | -5.26794 | -1.38891 | 0.34335  |
| B | -5.23917 | -3.1071  | 0.78073  |
| H | -3.56267 | -1.71115 | 2.29873  |
| B | -4.76584 | -4.03491 | -0.67114 |
| H | -3.04673 | -4.48463 | 1.34078  |
| H | -2.23689 | -4.23613 | -1.53587 |
| C | -3.06092 | 0.35597  | 0.19934  |
| B | -5.79937 | -2.60337 | -0.84073 |
| H | -5.09524 | -0.30551 | -2.01868 |
| H | -4.61411 | -3.11511 | -3.13627 |
| H | -5.91412 | -0.56103 | 0.88496  |
| H | -5.96205 | -3.52677 | 1.62121  |
